CORRECTION

# Correction: Engineering Multi-Walled Carbon Nanotube Therapeutic Bionanofluids to Selectively Target Papillary Thyroid Cancer Cells

**Idit Dotan, Philip J. R. Roche, Michael Tamilya, Miltiadis Paliouras, Elliot J. Mitmaker, Mark A. Trifiro**

Dr. Michael Tamilya is not included in the author byline. He should be listed as the third author and affiliated with Lady Davis Institute for Medical Research-Jewish General Hospital; Montreal, QC, Canada and Division of Endocrinology, Jewish General Hospital; Montreal, QC, Canada. The contributions of this author are as follows: Dr. Tamilya was involved in the very early process of the work describe in the paper, in both discussions and experimental design.

## Reference

1. Dotan I, Roche PJR, Paliouras M, Mitmaker EJ, Trifiro MA (2016) Engineering Multi-Walled Carbon Nanotube Therapeutic Bionanofluids to Selectively Target Papillary Thyroid Cancer Cells. PLoS ONE 11(2): e0149723. doi:[10.1371/journal.pone.0149723](https://doi.org/10.1371/journal.pone.0149723) PMID: [26901566](https://pubmed.ncbi.nlm.nih.gov/26901566/)

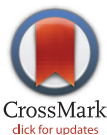

## OPEN ACCESS

**Citation:** Dotan I, Roche PJR, Tamilya M, Paliouras M, Mitmaker EJ, Trifiro MA (2016) Correction: Engineering Multi-Walled Carbon Nanotube Therapeutic Bionanofluids to Selectively Target Papillary Thyroid Cancer Cells. PLoS ONE 11(6): e0158022. doi:[10.1371/journal.pone.0158022](https://doi.org/10.1371/journal.pone.0158022)

**Published:** June 16, 2016

**Copyright:** © 2016 Dotan et al. This is an open access article distributed under the terms of the [Creative Commons Attribution License](https://creativecommons.org/licenses/by/4.0/), which permits unrestricted use, distribution, and reproduction in any medium, provided the original author and source are credited.
